# Supplementary material
Source: Springer Nature journal article supplement (https://www.springermedizin.de/resource/supplementary/12958_2011_854_MOESM3_ESM.pdf/9569002)

**A**

pH

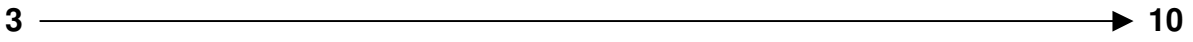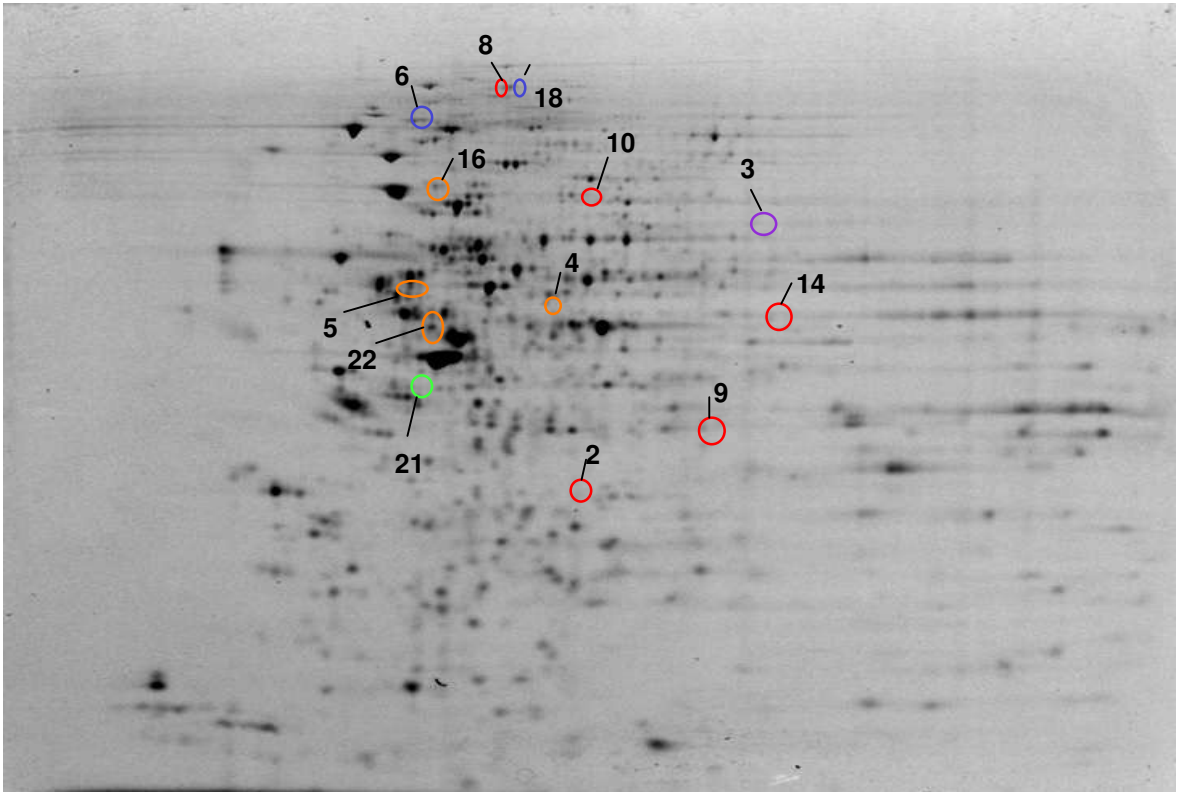**B**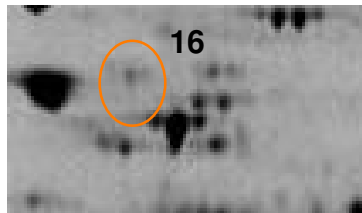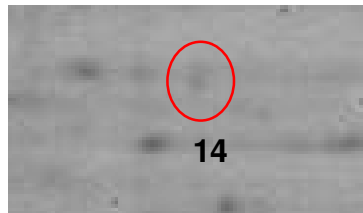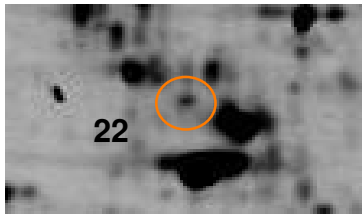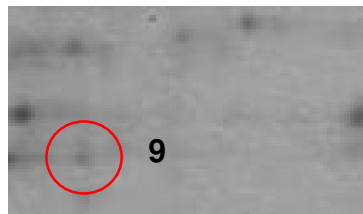

Supplement: MOESM3 [file 9569002]
